# Supplementary material for: Circadian RNA expression elicited by 3’-UTR IRAlu-paraspeckle associated elements
Source: eLife. 2016 Jul 21;5:e14837. doi: 10.7554/eLife.14837 (PMC4987140; doi:10.7554/eLife.14837)
Supplement: Figure 6—source data 1. — DOI: http://dx.doi.org/10.7554/eLife.14837.018 [file elife-14837-fig6-data1.xlsx]

## Sheet: Feuil1
Transcript unique to oligo S1 and S2 with a FPKM>1 (4268 items)	Transcripts unique to oligo S1 and S2 with a FPKM>1 - only gene officiel abbreviations (3928 items)	Hugues et al 2007 - only gene officiel abbreviations (362 items)	Menet et al 2012 - only gene officiel abbreviations (675 items) arhythmic-rhythmic (AR-R)
5_8S_rRNA	5_8S_rRNA	Aass	Aacs
5S_rRNA	5S_rRNA	Abca8a	Abcb10
7SK	7SK	Abcc5	Abhd14b
Aaas	Aaas	Abcd2	Abhd2
AABR07000402.1	Aacs	Abhd8	Abhd6
AABR07000404.1	Aak1	Acat1	Ablim1
AABR07000451.1	Aamp	Acot1	Ablim3
AABR07002564.1	Aars	Acss2	Acat3
AABR07002624.1	Aarsd1	Actn1	Acnat1
AABR07003017.1	Aasdh	Actn2	Aco1
AABR07004112.1	Aatf	Adamdec1	Aco2
AABR07004881.1	Abca1	Adcy7	Acp6
AABR07004894.1	Abca2	AF529169	Acsl1
AABR07005779.2	Abca3	Agtrl1	Actb
AABR07006160.1	Abca7	Ahsa1	Actn1
AABR07006458.1	Abcb1a	AI848100	Adar
AABR07008097.1	Abcb6	Ak3	Adck5
AABR07008377.1	Abcc5	Akt3	ADD1
AABR07008379.1	Abce1	Aldh1a1	Adh1
AABR07008505.1	Abcf1	Aldh1l1	Adh7
AABR07009397.1	Abcf2	Aldh2	Adi1
AABR07009715.1	Abcf3	Aldh7a1	Afmid
AABR07010570.1	Abhd14b	Aldh9a1	Agpat6
AABR07010583.1	Abhd16a	Aldoc	Agtr1a
AABR07010705.1	Abhd2	Alg8	Ahctf1
AABR07011951.1	Abhd8	Alox12e	Ahdc1
AABR07012039.1	Abi2	Alox15	Ahr
AABR07012583.3	Ablim1	Als4	Ak3
AABR07012583.4	Abr	Angpt1	Ak3l1
AABR07013302.1	ACA64	Ankrd12	Akap13
AABR07013801.1	Acaca	Anks1b	Akr1c14
AABR07013802.1	Acadl	Antxr2	Akr1c19
AABR07014239.1	Acat1	Ap1s2	Akr1c20
AABR07014242.1	Acbd3	Aqp11	Akr1d1
AABR07015006.1	ACEA_U3	Arf4	Alad
AABR07015042.1	Acin1	Arhgap29	Alb
AABR07015079.1	Acly	Arl4a	Aldh1a1
AABR07015180.1	Aco2	Arntl	Aldh1a7
AABR07015505.1	Acot7	Arpp21	Aldh4a1
AABR07016056.1	Acp2	Arsg	Als2
AABR07016577.1	Acrbp	Asb14	Als2cl
AABR07017110.1	Acsl1	Asphd2	Amdhd1
AABR07020860.1	Acsl3	Atp8b1	Amt
AABR07021220.1	Acsl5	Banf1	Angptl2
AABR07021503.1	Acsm1	Basp1	Ank
AABR07021759.1	Actb	Bmp6	Ankrd15
AABR07021840.1	Actg1	C79601	Ankrd46
AABR07024058.3	Actn1	Camkk2	AOP2
AABR07024104.2	Actn4	Canx	Ap3m1
AABR07024106.1	Actr1a	Cbln1	Apbb3
AABR07024206.1	Actr1b	Cbr2	Apobec1
AABR07024264.1	Actr2	Ccbe1	Apon
AABR07024593.2	Actr3	Ccbl1	Appl2
AABR07024666.1	Acvr1b	Ccdc85b	Arf5
AABR07024907.1	Acy1	Ccl19	Arfgap1
AABR07024908.1	Adam10	Ccnjl	Arfrp1
AABR07025328.1	Adam17	Cd24a	Arg1
AABR07026197.1	Adam22	Cdc42ep2	Arhgef10l
AABR07026311.1	Adam9	Cdh11	Arhgef19
AABR07026424.1	Adar	Cebpd	Arhgef7
AABR07026797.1	Adck2	Ces3	Arid5b
AABR07027088.1	Adcy6	Cgrrf1	Arl6ip2
AABR07027388.1	Add1	Chchd7	Arrdc2
AABR07027575.1	Add3	Chordc1	Arsg
AABR07027752.4	Adgrb1	Cilp	Asb13
AABR07027753.2	Adh4	Cirbp	Asl
AABR07027811.6	Adipor1	Cited1	Aspa
AABR07027854.1	Adipor2	Cldn12	Ass1
AABR07028027.1	Adnp	Cldn6	Atad3a
AABR07028795.1	Adrbk1	Clock	Atf4
AABR07028886.3	Adrm1	Cmtm3	Atf5
AABR07029195.1	Adsl	Cmtm6	Atg16l2
AABR07030156.1	Adss	Cmtm7	Atp11a
AABR07030156.2	Aebp2	Cndp2	Atp1b1
AABR07030265.1	Aen	Col4a1	Atp5g3
AABR07030494.1	Aes	Colec11	Atr
AABR07030566.1	Aff3	Cpne7	Atxn7
AABR07030566.2	Aff4	Cpt1a	Auh
AABR07030568.2	Afg3l1	Creld2	Azin1
AABR07030568.3	Afg3l2	Cry1	Bach1
AABR07030568.6	Aftph	Cry2	Baiap2
AABR07030568.7	Aga	Cryzl1	Baiap2l1
AABR07030568.8	Agap1	Cstad	Baz1b
AABR07030781.1	Agap3	Ctf1	Bbox1
AABR07030911.1	Agfg1	Ctgf	Bcap37
AABR07033324.1	Aggf1	Cx3cl1	Bcar3
AABR07033465.1	Ago1	Cybrd1	Bche
AABR07033720.1	Ago2	Cyp2a4	Bcl2l1
AABR07033745.2	Agpat1	Cyp2a5	Bclaf1
AABR07034362.1	Agpat3	Cyp2f2	Blvrb
AABR07034742.1	Agpat5	Cys1	Bmp1
AABR07035074.1	Agtrap	Cysltr1	Bptf
AABR07035107.1	Ahctf1	Dab2	Brwd2
AABR07035428.1	Ahcy	Dad1	Btg1
AABR07035796.1	Ahcyl1	Dapk1	Btg2
AABR07036855.1	Ahcyl2	Dbp	Cabc1
AABR07037203.1	Ahdc1	Ddah1	Cald1
AABR07037356.1	Ahi1	Ddit4l	Calr
AABR07038019.1	Ahnak2	Dgat2	Camk2b
AABR07039234.1	Ahsa1	Dhtkd1	Car5a
AABR07040938.1	Ahsa2	Dip2a	Carhsp1
AABR07041724.1	AI314180	Dnahc9	Carkl
AABR07042359.1	Aida	Dnajb1	Cars
AABR07042397.1	Aimp1	Dnajc10	Cbr1
AABR07042792.1	Aimp2	Doc2b	Ccdc131
AABR07042821.1	Ak1	Dpys	Cd5l
AABR07042903.1	Ak2	Dtx4	Cd81
AABR07043421.1	Ak6	Dusp5	Cda
AABR07043601.4	Akap1	Dynll1	Cdc42ep1
AABR07043748.1	Akap17a	Dynll1	Cdo1
AABR07044273.1	Akap5	Dynlrb2	Cecr2
AABR07044711.1	Akap6	Ednrb	Centa2
AABR07044933.1	Akap8	Egfl7	Ces3
AABR07044977.1	Akap8l	Eif5	Chd9
AABR07045454.1	Akap9	Enc1	Chn2
AABR07046778.1	Akr1a1	Eno3	Chordc1
AABR07047140.1	Akr1b1	Ephx1	Clast2
AABR07047219.1	Akr1b1-ps2	Etv1	Clcn2
AABR07047262.1	Akr1b8	Etv5	Clcn7
AABR07048064.1	Akt1	Fcho1	Cldn2
AABR07048308.1	Akt1s1	Fhit	Cldn3
AABR07048397.1	Alcam	Fkbp4	Clec2d
AABR07048791.1	Aldh18a1	Fkbp5	CLM1-A
AABR07049353.1	Aldh1l2	Fli1	CMAH
AABR07049405.1	Aldh7a1	Fmo1	Cmtm6
AABR07049960.1	Aldoa	Fmo2	Comt
AABR07049960.2	Alg10	Fut2	Coro1b
AABR07051326.1	Alg3	Fyn	Cp
AABR07052085.1	Alk	Fzd3	Cpb2
AABR07052388.1	Alms1	G0s2	Cps1
AABR07052523.1	Alyref	Galntl4	Crabp2
AABR07052758.1	Amer2	Gas1	Crcp
AABR07053516.2	Amfr	Gldc	Creb1
AABR07053580.1	Ammecr1	Glt8d2	Crebzf
AABR07053734.1	Ampd2	Glul	Crp
AABR07053749.1	Amz2	Gm114	Cryl1
AABR07054000.1	Anapc13	Gm129	Cs
AABR07054189.1	Anapc15	Gnai1	Csad
AABR07054332.1	Anapc5	Gnas	Cth
AABR07054361.1	Anapc7	Gnb3	Ctsc
AABR07054362.1	Ank2	Gne	Ctsl
AABR07054370.1	Ank3	Gpihbp1	Cul4a
AABR07054460.4	Ankhd1	Gpr149	Cxcl12
AABR07054983.1	Ankib1	Gpr155	Cxxc5
AABR07055280.1	Ankle1	Gpr68	Cyb5
AABR07055492.1	Ankle2	Gpr83	Cyp2a12
AABR07055527.1	Ankra2	Gstk1	Cyp2b9
AABR07055919.1	Ankrd11	Gstm7	Cyp2c37
AABR07056556.2	Ankrd13a	H13	Cyp2c54
AABR07057196.1	Ankrd17	Hif3a	Cyp2d22
AABR07057683.1	Ankrd24	Hist1h1e	Cyp4f14
AABR07058124.3	Ankrd26	Hist1h3b	Cyp4f15
AABR07058267.1	Ankrd28	Hist1h3d	D18Ertd653e
AABR07058287.1	Ankrd40	Hist1h3e	D19Ertd721e
AABR07058320.1	Ankrd50	Hist1h3f	D5Ertd579e
AABR07058514.2	Ankrd52	Hist1h4a	Dazap1
AABR07058699.2	Anln	Hist1h4b	Dclre1a
AABR07058745.1	Anlnl1	Hist1h4c	Dcps
AABR07058886.1	Ano6	Hist1h4h	Dcxr
AABR07058955.2	Ano8	Hist1h4i	Ddhd2
AABR07058985.1	Anp32a	Hist1h4i	Ddt
AABR07059004.1	Anp32b	Hist1h4j	Ddx17
AABR07059168.2	Anp32e	Hist1h4j	Dedd2
AABR07059632.3	Anxa1	Hist1h4k	Dexi
AABR07059879.1	Anxa4	Hist1h4m	Dgat
AABR07059925.1	Ap1ar	Hist2h2aa2	Dgat1
AABR07060519.1	Ap1b1	Hist2h2be	Dgat2
AABR07060593.1	Ap1m1	Hist2h3b	Dgcr6
AABR07060610.1	Ap1s3	Hist2h3c1	Dhrs3
AABR07060778.1	Ap2a2	Hist2h3c2	Diap1
AABR07061378.1	Ap2m1	Hlf	Dirc2
AABR07061614.2	Ap2s1	Hmgcs2	Dlst
AABR07061902.1	Ap3b2	Hnrpc	Dmtf1
AABR07062799.2	Ap3d1	Hnrpdl	Dna2l
AABR07063421.1	Ap3s2	Hnt	Dnaja1
AABR07063462.1	Apbb1	Hrasls	Dnajc19
AABR07063544.1	Apc	Hrk	Dopey2
AABR07063703.1	Apex1	Hsp90aa1	Dot1
AABR07064099.1	Aph1a	Hspa1a	Dot1l
AABR07064980.1	Api5	Hspa8	Dpp3
AABR07065406.1	Aplp1	Hspb1	Dpp4
AABR07065438.1	Aplp2	Ifit3	Dpp9
AABR07065593.2	Apobr	Ifitm1	Dpys
AABR07065886.1	App	Igfbp3	Dtx3l
AABR07066059.1	Appbp2	Il22	Echdc1
AABR07066416.1	Appl1	Iltifb	Edg1
AABR07066510.1	Aprt	Inadl	Eif4b
AABR07066677.1	Aqr	Iqsec3	Elmo3
AABR07066798.1	Arcn1	Itga6	Elp3
AABR07067267.1	Arf1	Jam2	Eme2
AABR07067469.2	Arf3	Jundm2	Eml3
AABR07067506.1	Arf4	Kcnj10	Enpp3
AABR07067526.1	Arf5	Kitl	Ent1
AABR07067760.1	Arf6	Klf15	Entpd5
AABR07068587.1	Arfgap1	Klf9	Epb4.1l4b
AABR07069599.1	Arfgap2	Klk1b22	Epha2
AABR07070032.1	Arfgap3	Klk1b26	Epm2aip1
AABR07070810.1	Arfgef1	Klk1b27	Eps8l2
AABR07071000.1	Arfip2	Klk1b9	Ern1
AABR07072207.1	Arfrp1	L3mbtl3	Erp29
AABR07072281.1	Arg1	Lefty1	Esco1
AABR07072440.1	Arglu1	Leo1	Esr1
AABR07072539.3	Arhgap1	Leprot	Esrra
AABR07073038.1	Arhgap11a	Lima1	Etnk2
AABR07073039.1	Arhgap12	Lman2l	Evi5
AABR07073045.1	Arhgap19	Lnx1	Exod1
Aak1	Arhgap21	Lonrf1	Exph5
Aamp	Arhgap32	Lonrf3	Extl3
Aars	Arhgap39	Lox	F12
Aarsd1	Arhgap5	Lrp8	fad123
Aasdh	Arhgdia	Lrpap1	Farp1
Aatf	Arhgef1	Lrrc4	Fbxo21
Abca1	Arhgef12	Ly6c	Fchsd2
Abca2	Arhgef2	Mapk12	Fdx1
Abca3	Arhgef25	Mcm7	Fem1c
Abca7	Arhgef28	Mettl7a	Fga
Abcb1a	Arid1a	Mif	Fgb
Abcb6	Arid1b	Mlc1	Fgfr2
Abcc5	Arid2	Mpa2l	Fgfr4
Abce1	Arid3a	Mthfd1l	Fgg
Abcf1	Arid4a	Mtmr11	Fkbp4
Abcf2	Arid4b	Mycn	Fkbp5
Abcf3	Arih2	Napb	Flame-3
Abhd16a	Arl1	Narg3	Flnb
Abhd8	Arl10	Nfil3	Fmo1
Abi2	Arl2bp	Ngb	Fmo5
Abr	Arl3	Nkiras1	Foxo3a
AC093965.1	Arl6ip1	Nmb	Foxq1
AC094421.1	Arl6ip4	Nov	Fpgs
AC095267.4	Arl6ip5	Npas2	Ftl1
AC096239.3	Arl8a	Npnt	Fto
AC096239.4	Arl8b	Nptx1	Fus
AC096370.2	Armc9	Nr1d1	Fzd7
AC096792.1	Armcx3	Nr1d2	Gabarapl1
AC097890.1	Armcx6	Nudc	Gck
AC098125.3	Arpc2	Nudc-ps1	Ggnbp1
AC099089.1	Arpc3	Nudt6	Gjb1
AC103024.2	Arpc4	Nup155	Gjb2
AC103090.1	Arpc5	Oact1	Gldc
AC105662.1	Arpc5l	Oact5	Glt1d1
AC106292.2	Arrdc1	Odf2	Glt28d2
AC106663.1	Arrdc2	Olig1	Gm1381
AC106663.5	Arvcf	Oplah	Gm608
AC107580.1	Asap1	P4ha2	Gnl2
AC108631.2	Asap2	Parp3	Gnmt
AC109096.1	Ascc2	Pcbp2	Golga5
AC109958.1	Ascl1	Pcdh12	Golim4
AC110387.1	Ash1l	Pdk1	Gpr146
AC110709.1	Ash2l	Pdxk	Gps2
AC111831.2	Asic1	Peci	Gpt1
AC114446.1	Asns	Per1	Grb14
AC115341.1	Asnsd1	Per2	Gsta3
AC117101.1	Asph	Per3	Gtf3c1
AC117869.1	Asphd1	Phactr2	Hacl1
AC118490.1	Aspm	Pink1	Hal
AC118802.1	Asun	Pkp2	Hapln4
AC118841.1	Asxl2	Pla2g7	Hbld1
AC119336.1	Atad1	Plat	Hdac5
AC120262.2	Atad2	Plce1	Hemk1
AC120310.2	Atad2b	Plcl2	Herpud1
AC120310.3	Atat1	Plekha4	Hexim1
AC120727.1	Ate1	Plekhg4	Hfe2
AC123185.3	Atf1	Por	Hif1an
AC123471.1	Atf2	Pparbp	Hist1h1c
AC126148.1	Atf4	Ppm2c	Hist1h2bc
AC126148.2	Atf5	Prom1	Hist1h4i
AC126148.3	Atf6	Prpf31	Hlf
AC127013.1	Atf6b	Pscd1	Hnf1b
AC128154.1	Atf7	Psen2	hnRNP
AC128212.1	Atf7ip	Ptger4	Hnrnpl
AC128792.2	Atg101	Ptgis	Hpd
AC130232.2	Atg16l1	Ptplb	Hrsp12
AC135400.1	Atg2b	Punc	Hsd11b1
AC135696.1	Atg3	Pvalb	Hsp110
AC136661.1	Atg4b	Rasd2	Hsp90ab1
AC139950.1	Atg4d	Rasl10b	Hspa8
AC140988.1	Atg9a	Rasl11a	Idh2
AC141344.2	Atic	Rasl11b	Ifrg15
ACA64	Atmin	Rassf8	Igfbp4
Acaca	Atn1	Rbbp8	Il4ra
Acadl	Atox1	Rcor2	Indol1
Acat1	Atp11a	Reck	Ing4
Acbd3	Atp13a1	Rfc2	Inhba
ACEA_U3	Atp1a1	Rhbdl2	Inpp4a
Acin1	Atp1b1	Ric3	Ints7
Acly	Atp1b3	Rnasel	Irak2
Acot7	Atp2a2	Rorc	ire1
Acp2	Atp2b1	Rps20	Irf2
Acrbp	Atp2b4	Rsad1	Irf6
Acsl3	Atp2c1	Rufy3	Irgq
Acsl5	Atp5a1	Runx2	Irs1
Acsm1	Atp5b	Scarb1	Isgf3g
Actg1	Atp5c1	Scd3	Itga5
Actn4	Atp5d	Scn5a	Itih3
Actr1a	Atp5e	Sdccag1	Itih4
Actr1b	Atp5g1	Sec14l4	Itpr1
Actr2	Atp5g2	Serpine1	Itpr2
Actr3	Atp5g3	Sez6	Itsn
Acvr1b	Atp5h	Sfrp5	Jmjd1b
Acy1	Atp5i	Sfrs6	Jmjd1c
Adam10	Atp5j	Sin3b	Jmjd2a
Adam17	Atp5j2	Slc16a12	Kbtbd4
Adam22	Atp5l	Slc38a2	Kcnk5
Adam9	Atp5o	Slc39a14	Kcnn2
Adck2	Atp6ap1	Slc41a3	Kif13b
Adcy6	Atp6v0a1	Slc43a3	Klf12
Add3	Atp6v0c	Slitrk6	Klf15
Adgrb1	Atp6v0d1	Smc6l1	Klhl25
Adh4	Atp6v1b2	Snrk	Krt18
Adipor1	Atp6v1c1	Sod2	Lasp1
Adipor2	Atp6v1d	Sorcs1	Lats1
Adnp	Atp6v1f	Spnb2	Lcp1
Adrbk1	Atp6v1g1	Spred1	Lect2
Adrm1	Atp9a	Spsb3	Lgals3bp
Adsl	Atp9b	Stard5	Llgl2
Adss	Atpif1	Stk35	Lmo7
Aebp2	Atrnl1	Stk36	Lnx2
Aen	Atrx	Sulf1	Loxl4
Aes	Atxn10	Sult1a1	Lrp1
Aff3	Atxn2	Syne1	Lrp5
Aff4	Atxn2l	Syt13	Lrrc16
Afg3l1	Atxn3	Tardbp	Lrrc28
Afg3l2	Atxn7l3b	Tbx19	Lrrc3
Aftph	Auh	Tef	Lrrc8d
Aga	Aup1	Tekt2	Ltbr
Agap1	Aurka	Thra	Luc7l
Agap3	Aurkb	Tieg3	Mafb
Agfg1	Auts2l	Timp3	Maged1
Aggf1	Avl9	Tmem118	Man2a1
Ago1	Avpi1	Tmem4	Map2k3
Ago2	B2m	Tmem57	Map3k4
Agpat1	B3galnt2	Tmhs	Map3k5
Agpat3	B4galnt4	Tmprss2	Map3k7ip2
Agpat5	Babam1	Tnfaip2	Mast3
Agtrap	Bag3	Tor1aip2	Mat1a
Ahcy	Bag4	Tsc22d3	Mbl2
Ahcyl1	Bag5	Tshz2	Mcart1
Ahcyl2	Bag6	Tspan17	Mccc2
Ahi1	Banf1	Tspan4	Mcm10
Ahnak2	Bap1	Txnl4	Med14
Ahsa1	Bard1	Uaca	Med20
Ahsa2	Bax	Ubie	Med22
AI314180	Baz1a	Uchl1	Med27
Aida	Baz1b	Uhrf2	Med28
Aimp1	Baz2a	Unc5d	Megf9
Aimp2	Baz2b	Usf2	mFLJ00298
Ak1	Bbx	Usp2	Mfsd2
Ak2	Bcam	Usp54	Mgmt
Ak6	Bcap31	Vcam1	Midn
Akap1	Bcas2	Vdac1	MINK
Akap17a	Bcat1	Vps13a	Mkl2
Akap5	Bckdk	Vps37c	Mn1
Akap6	Bcl2l13	Wdr78	Morc3
Akap8	Bcl2l2	Wee1	Mpdu1
Akap8l	Bcl6	Wnt9a	Mpzl2
Akap9	Bcl7c	Wwox	Mrps9
Akr1a1	Bclaf1	Wwp2	Msi2
Akr1b1	Bdh1	Ypel1	mSSH-3L
Akr1b1-ps2	Bdp1	Zbtb16	Mta1
Akr1b8	Becn1	Zfp161	Mta2
Akt1	Bex2	Zfp191	Mtap7d1
Akt1s1	Bex4	Zfp597	Mtmr4
Alcam	Bicd2		Mug1
Aldh18a1	Bin1		Myc
Aldh1l2	Birc5		Myo1b
Aldh7a1	Birc6		Myo1e
Aldoa	Blm		Myo9b
Alg10	Bloc1s1		Nadk
Alg3	Bloc1s2		Nat9
Alk	Blvrb		Ncoa5
Alms1	Bmi1		Nek4
Alyref	Bmpr2		Nek6
Amer2	Bms1		Nelf
Amfr	Bmyc		Nf2
Ammecr1	Bnip2		Nfat5
Ampd2	Bod1l1		Nfic
Amz2	Bola2		Nfyb
Anapc13	Bop1		Ninj1
Anapc15	Bpgm		Nme3
Anapc5	Bptf		Nostrin
Anapc7	Braf		Notch1
Ank2	Brap		Npps2
Ank3	Brca2		Nr0b2
Ankhd1	Brd1		Nr1i3
Ankib1	Brd2		Nr2f2
Ankle1	Brd3		Nr2f6
Ankle2	Brd4		Nudt3
Ankra2	Brd7		Olfr1033
Ankrd11	Brd8		Orc5l
Ankrd13a	Bre		Osbpl9
Ankrd17	Brf1		Osgin1
Ankrd24	Bri3		P4ha1
Ankrd26	Brk1		Pah
Ankrd28	Brms1		Papss2
Ankrd40	Brms1l		Paqr9
Ankrd50	Brwd1		Parp14
Ankrd52	Bsg		Parp16
Anln	Bspry		Parp3
Anlnl1	Bst2		Parp9
Ano6	Btbd2		Pcbp4
Ano8	Btbd7		Pcdh1
Anp32a	Btf3		Pcsk4
Anp32b	Btg1		Pctk2
Anp32e	Btg2		Pcyt1a
Anxa1	Bub1b		Pde3b
Anxa4	Bub3		Pdhb
Ap1ar	Bud31		Pdk2
Ap1b1	Bysl		Pemt
Ap1m1	Bzw1		Pex1
Ap1s3	C1qbp		Pex3
Ap2a2	C2cd5		Pex7
Ap2m1	Cab39		Pfdn2
Ap2s1	Cables2		Pgrmc1
Ap3b2	Cabp1		Phb2
Ap3d1	Cacna1c		Phospho1
Ap3s2	Cacna1d		Pik3ap1
Apbb1	Cacna1g		Pkd2
Apc	Cacna2d1		Pla2g12b
Apex1	Cacnb2		PLC-epsilon
Aph1a	Cacnb3		Plec1
Api5	Cacng6		Plekha8
Aplp1	Cacng7		Plekhf1
Aplp2	Cactin		Plk3
Apobr	Cacul1		Pltp
App	Cacybp		Plxnb2
Appbp2	Cad		Pnkd
Appl1	Cadm1		Pnkp
Aprt	Cadm4		Pnpla2
Aqr	Cadps		Pnrc2
Arcn1	Calcoco1		Pon1
Arf1	Calm1		Ppp1r10
Arf3	Calm2		Ppp1r15b
Arf4	Calm3		Ppp1r3b
Arf6	Calr		Ppp2r5e
Arfgap2	Calu		Pqlc2
Arfgap3	Camk2n1		Prepl
Arfgef1	Camsap1		Prkcbp1
Arfip2	Camsap2		Prlr
Arglu1	Cand1		Prodh
Arhgap1	Cand2		Pscd1
Arhgap11a	Cant1		Psd3
Arhgap12	Canx		Psen2
Arhgap19	Cap1		Psma1
Arhgap21	Capn10		Psmd14
Arhgap32	Capn2		Psmd4
Arhgap39	Capn8		Pspc1
Arhgap5	Capns1		Ptbp1
Arhgdia	Caprin1		Ptch1
Arhgef1	Capza1		Ptp4a1
Arhgef12	Capza2		Ptpn3
Arhgef2	Capzb		Ptpn9
Arhgef25	Car11		Ptprd
Arhgef28	Card10		Ptprf
Arid1a	Carm1		Pvrl1
Arid1b	Cars		Qprt
Arid2	Casc3		Qscn6
Arid3a	Caskin1		Qsox1
Arid4a	Casp2		R3hdm2
Arid4b	Casz1		Rab4a
Arih2	Cbfa2t2		Rab4b
Arl1	Cblb		Rabep1
Arl10	Cbx1		Rai14
Arl2bp	Cbx4		Ranbp9
Arl3	Cbx5		Rarres2
Arl6ip1	Cbx6		Rasgrp2
Arl6ip4	Cbx7		Rassf3
Arl6ip5	Cc2d1a		Rbbp4
Arl8a	Cc2d1b		Rbm25
Arl8b	Ccar1		Rbm35b
Armc9	Ccar2		Rbmx
Armcx3	Ccdc104		Rbpms
Armcx6	Ccdc12		Rcor1
Arpc2	Ccdc124		Repin1
Arpc3	Ccdc127		Reps1
Arpc4	Ccdc136		Rere
Arpc5	Ccdc155		Rev1
Arpc5l	Ccdc174		Rfxank
Arrdc1	Ccdc34		Rgl3
Arvcf	Ccdc47		Rgs16
Asap1	Ccdc50		Rhobtb1
Asap2	Ccdc6		Rhod
Ascc2	Ccdc86		Rilp
Ascl1	Ccdc88a		Riok2
Ash1l	Ccdc88c		Rmnd1
Ash2l	Ccdc89		Rnf19b
Asic1	Ccdc9		Rnf213
Asns	Ccdc91		Rnf43
Asnsd1	Ccdc92		Rnpep
Asph	Cchcr1		Rrbp1
Asphd1	Ccna2		Rtp3
Aspm	Ccnd3		Rusc2
Asun	Ccnf		Saa1
Asxl2	Ccng1		Saa2
Atad1	Ccnj		Samd9l
Atad2	Ccnl2		Samm50
Atad2b	Ccny		Sar1b
Atat1	Ccnyl1		Sardh
Ate1	Ccpg1		Sars
Atf1	Ccs		Scaf1
Atf2	Cct2		Scarb1
Atf6	Cct3		Scotin
Atf6b	Cct4		Sdhb
Atf7	Cct5		Sdro
Atf7ip	Cct6a		Sds
Atg101	Cct7		Sec24a
Atg16l1	Cct8		Senp6
Atg2b	Ccz1b		Serpina12
Atg3	Cd164		Serpinf2
Atg4b	Cd2ap		Sf3b3
Atg4d	Cd2bp2		Sfrs4
Atg9a	Cd44		Sfrs7
Atic	Cd59		Sfxn1
Atmin	Cd63		Sgpl1
Atn1	Cdc20		Sh2b3
Atox1	Cdc25a		Sidt2
Atp13a1	Cdc27		Sirt4
Atp1a1	Cdc34		Skap2
Atp1b3	Cdc37		Ski
Atp2a2	Cdc42		Slc10a5
Atp2b1	Cdc42bpa		Slc12a6
Atp2b4	Cdc42bpb		Slc15a4
Atp2c1	Cdc42bpg		Slc16a6
Atp5a1	Cdc5l		Slc17a3
Atp5b	Cdc73		Slc25a13
Atp5c1	Cdca3		Slc25a37
Atp5d	Cdca7		Slc26a1
Atp5e	Cdca8		Slc29a1
Atp5g1	Cdh2		Slc2a2
Atp5g2	Cdk1		Slc36a1
Atp5h	Cdk10		Slc37a4
Atp5i	Cdk11b		Slc41a2
Atp5j	Cdk12		Slc7a2
Atp5j2	Cdk16		Slc9a3r1
Atp5l	Cdk19		Slco1a4
Atp5o	Cdk2ap1		Smarcd2
Atp6ap1	Cdk4		Smc5
Atp6v0a1	Cdk5		Snag1
Atp6v0c	Cdk5r2		Snf1lk
Atp6v0d1	Cdk5rap3		Snrk
Atp6v1b2	Cdk6		Snx17
Atp6v1c1	Cdk8		Solh
Atp6v1d	Cdkal1		Sorbs2
Atp6v1f	Cdkn2b		Sos2
Atp6v1g1	Cdr2		sox-13
Atp9a	Cdr2l		Sox13
Atp9b	Cds2		Spata13
Atpif1	Cdv3		Spnb3
Atrnl1	Cdyl		Sppl2b
Atrx	Cebpg		Spsb3
Atxn10	Cebpz		Sqrdl
Atxn2	Celf1		Sqstm1
Atxn2l	Celsr3		Srbd1
Atxn3	Cenpe		Srxn1
Atxn7l3b	Cenpf		Ssh2
Aup1	Cenpo		St3gal1
Aurka	Cenpt		St3gal3
Aurkb	Cep104		Stag1
Auts2l	Cep131		Stat5b
Avl9	Cep164		Stip1
Avpi1	Cep170b		Stk40
B2m	Cep19		Stx4a
B3galnt2	Cep250		Stxbp2
B4galnt4	Cep290		Sult1d1
Babam1	Cep44		Supl15h
Bag3	Cep63		Tbc1d16
Bag4	Cep68		Tbx3
Bag5	Cep85		Tcf20
Bag6	Cerk		Tcta
Banf1	Cers2		Tead3
Bap1	Cers4		Tex2
Bard1	Cers5		Tgm2
Bax	Cetn2		Thpo
Baz1a	Cfdp1		Thrap3
Baz2a	Cfl1		Thrsp
Baz2b	Cggbp1		Tilz3b
Bbx	Cgn		Timm9
Bcam	Cgref1		Tk1
Bcap31	Chac1		Tle1
Bcas2	Chaf1a		Tmco4
Bcat1	Chchd10		Tmem134
Bckdk	Chchd2		Tmem147
Bcl2l13	Chchd3		Tmem14c
Bcl2l2	Chchd6		Tmem150
Bcl6	Chchd7		Tmem161b
Bcl7c	Chd1		Tmem175
Bdh1	Chd2		Tmem189
Bdp1	Chd3		Tmem30a
Becn1	Chd4		Tmem37
Bex2	Chd5		Tmem39a
Bex4	Chd6		Tmem50a
Bicd2	Chd7		Tnfaip2
Bin1	Chd8		Tnfaip8l1
Birc5	Chd9		Tnk2
Birc6	Cherp		Tnpo2
Blm	Chga		Tns1
Bloc1s1	Chgb		Tns3
Bloc1s2	Chmp1a		Tob2
Bmi1	Chmp2a		Tomm40
Bmpr2	Chmp3		Tomm40l
Bms1	Chmp4bl1		Top1
Bmyc	Chmp5		Tpst1
Bnip2	Chn2		Trim24
Bod1l1	Chpf		Trim25
Bola2	Chpf2		Trim41
Bop1	Chrac1		Trim56
Bpgm	Chtf18		Trim65
Braf	Chtf8		Trp53bp2
Brap	Cic		Trp53inp1
Brca2	Cirbp		Tsarg7
Brd1	Cisd1		Tsc22d3
Brd2	Cisd2		Tsku
Brd3	Cisd3		Tspan14
Brd4	Cit		Ttc19
Brd7	Cited1		Ttc23
Brd8	Ciz1		Tuba4a
Bre	Ckap2		Tuc1
Brf1	Ckap5		Txndc15
Bri3	Clasp1		Txnl4b
Brk1	Clasp2		Tysnd1
Brms1	Clasrp		U83174
Brms1l	Clcn3		Ubqln4
Brwd1	Clcn7		Uckl1
Bsg	Cldn3		Ugp2
Bspry	Cldnd1		Ugt1a1
Bst2	Clec2l		Ugt1a10
Btbd2	Clic1		Ugt1a2
Btbd7	Clic4		Ugt1a5
Btf3	Clint1		Ugt1a6a
Bub1b	Clip1		Ugt1a6b
Bub3	Clip2		Ugt1a7c
Bud31	Clk1		Ugt1a9
Bysl	Clk2		Ugt2a3
Bzw1	Clk3		Ugt2b35
C1qbp	Clmn		unknown
C2cd5	Cln6		Usp16
Cab39	Clns1a		Usp34
Cables2	Clpb		Utx
Cabp1	Clpp		Vnn1
Cacna1c	Clptm1		Vnn3
Cacna1d	Clptm1l		Vps13c
Cacna1g	Clpx		Vps37b
Cacna2d1	Clspn		Vps39
Cacnb2	Clstn1		Vti1-rp2
Cacnb3	Clta		Vtn
Cacng6	Cltb		Wdr91
Cacng7	Cltc		Wdtc1
Cactin	Clu		Wrnip1
Cacul1	Cmas		Wwp1
Cacybp	Cmss1		Xdh
Cad	Cmtr1		Xpnpep3
Cadm1	Cnbp		Xylb
Cadm4	Cndp2		Ythdf1
Cadps	Cnksr3		Ywhag
Calcoco1	Cnn3		Zadh1
Calm1	Cnot1		Zbtb39
Calm2	Cnot10		Zc3hav1
Calm3	Cnot2		Zfp187
Calu	Cnot3		Zfp207
Camk2n1	Cnot6		Zfp219
Camsap1	Cnppd1		Zfp276
Camsap2	Cnpy2		Zfp292
Cand1	Cnpy3		Zfp330
Cand2	Cnst		Zfp386
Cant1	Cntn1		Zfp513
Canx	Cntrl		Zfp523
Cap1	Cntrob		Zfp652
Capn10	Coa5		Zfp687
Capn2	Col24a1		Zfp787
Capn8	Col4a3bp		Zfr
Capns1	Col4a4		Zfyve1
Caprin1	Commd3		Zkscan1
Capza1	Commd7		Zmym2
Capza2	Commd9		Znfx1
Capzb	Copa		Zrsr1
Car11	Copb2		Zubr1
Card10	Cope
Carm1	Copg1
Casc3	Coprs
Caskin1	Cops4
Casp2	Cops5
Casz1	Cops6
Cbfa2t2	Cops7a
Cblb	Cops8
Cbx1	Copz1
Cbx4	Coq7
Cbx5	Coro1b
Cbx6	Coro1c
Cbx7	Cotl1
Cc2d1a	Cox14
Cc2d1b	Cox17
Ccar1	Cox4i1
Ccar2	Cox5b
Ccdc104	Cox6a1
Ccdc12	Cox6b1
Ccdc124	Cox6c
Ccdc127	Cox7a2
Ccdc136	Cox7a2l
Ccdc155	Cox7b
Ccdc174	Cox7c
Ccdc34	Cox8a
Ccdc47	Cpe
Ccdc50	Cpeb1
Ccdc6	Cpeb4
Ccdc86	Cplx1
Ccdc88a	Cpox
Ccdc88c	Cpsf1
Ccdc89	Cpsf2
Ccdc9	Cpsf3
Ccdc91	Cpsf6
Ccdc92	Cpsf7
Cchcr1	Cpt1a
Ccna2	Cramp1l
Ccnd3	Crb3
Ccnf	Creb3l1
Ccng1	Crebbp
Ccnj	Crebl2
Ccnl2	Crebzf
Ccny	Creld1
Ccnyl1	Creld2
Ccpg1	Crip1
Ccs	Crip2
Cct2	Crk
Cct3	Crocc
Cct4	Crtc1
Cct5	Crybg3
Cct6a	Cs
Cct7	Cse1l
Cct8	Csnk1a1
Ccz1b	Csnk1d
Cd164	Csnk1e
Cd2ap	Csnk1g1
Cd2bp2	Csnk1g2
Cd44	Csnk2a1
Cd59	Csnk2b
Cd63	Cspg5
Cdc20	Csrnp2
Cdc25a	Csrp1
Cdc27	Csrp2
Cdc34	Csrp2bp
Cdc37	Cst3
Cdc42	Cstf2t
Cdc42bpa	Ctage5
Cdc42bpb	Ctbp1
Cdc42bpg	Ctbp2
Cdc5l	Ctcf
Cdc73	Ctdnep1
Cdca3	Ctdp1
Cdca7	Ctdsp2
Cdca8	Ctdspl2
Cdh2	Ctnna1
Cdk1	Ctnna2
Cdk10	Ctnnb1
Cdk11b	Ctnnbl1
Cdk12	Ctps1
Cdk16	Ctps2
Cdk19	Ctr9
Cdk2ap1	Ctsa
Cdk4	Ctsb
Cdk5	Ctsd
Cdk5r2	Ctsl
Cdk5rap3	Cttn
Cdk6	Cttnbp2nl
Cdk8	Cuedc1
Cdkal1	Cul1
Cdkn2b	Cul3
Cdr2	Cul4a
Cdr2l	Cul5
Cds2	Cul7
Cdv3	Cul9
Cdyl	Cuta
Cebpg	Cutc
Cebpz	Cux1
Celf1	Cwc25
Celsr3	Cwc27
Cenpe	Cxcl14
Cenpf	Cxcl17
Cenpo	Cxxc1
Cenpt	Cyb5a
Cep104	Cyb5b
Cep131	Cyb5r4
Cep164	Cyc1
Cep170b	Cycs
Cep19	Cyfip2
Cep250	Cyhr1
Cep290	Cyp51
Cep44	Cystm1
Cep63	Cyth2
Cep68	Cyth3
Cep85	Dab2
Cerk	Dad1
Cers2	Dag1
Cers4	Dap
Cers5	Dars
Cetn2	Dazap1
Cfdp1	Dazap2
Cfl1	Dbf4
Cggbp1	Dbi
Cgn	Dbn1
Cgref1	Dbnl
Chac1	Dbp
Chaf1a	Dcaf13
Chchd10	Dcaf8
Chchd2	Dck
Chchd3	Dclk2
Chchd6	Dclre1a
Chchd7	Dctn1
Chd1	Dctn2
Chd2	Dctn6
Chd3	Dctpp1
Chd4	Dcun1d3
Chd5	Dda1
Chd6	Ddb1
Chd7	Ddhd2
Chd8	Ddi2
Cherp	Ddost
Chga	Ddr1
Chgb	Ddrgk1
Chmp1a	Ddt
Chmp2a	Ddx1
Chmp3	Ddx10
Chmp4bl1	Ddx11
Chmp5	Ddx17
Chpf	Ddx21
Chpf2	Ddx23
Chrac1	Ddx27
Chtf18	Ddx39b
Chtf8	Ddx3x
Cic	Ddx42
Cirbp	Ddx46
Cisd1	Ddx47
Cisd2	Ddx49
Cisd3	Ddx5
Cit	Ddx50
Cited1	Ddx54
Ciz1	Ddx6
Ckap2	Deaf1
Ckap5	Decr2
Clasp1	Dek
Clasp2	Dennd1a
Clasrp	Dennd5a
Clcn3	Denr
Cldnd1	Deptor
Clec2l	Derl1
Clic1	Desi1
Clic4	Dgkd
Clint1	Dgkh
Clip1	Dgkz
Clip2	Dhcr24
Clk1	Dhdh
Clk2	Dhrs4
Clk3	Dhrs7
Clmn	Dhx15
Cln6	Dhx16
Clns1a	Dhx30
Clpb	Dhx38
Clpp	Dhx9
Clptm1	Diablo
Clptm1l	Diaph1
Clpx	Diaph3
Clspn	Dido1
Clstn1	Dkc1
Clta	Dld
Cltb	Dlg1
Cltc	Dlg5
Clu	Dlst
Cmas	Dmpk
Cmss1	Dmtf1
Cmtr1	Dmxl2
Cnbp	Dnah11
Cndp2	Dnaja2
Cnksr3	Dnaja3
Cnn3	Dnaja4
Cnot1	Dnajb11
Cnot10	Dnajb12
Cnot2	Dnajb14
Cnot3	Dnajb2
Cnot6	Dnajb4
Cnppd1	Dnajc11
Cnpy2	Dnajc13
Cnpy3	Dnajc14
Cnst	Dnajc2
Cntn1	Dnajc21
Cntrl	Dnajc27
Cntrob	Dnajc3
Coa5	Dnajc5
Col24a1	Dnajc7
Col4a3bp	Dnajc8
Col4a4	Dnajc9
Commd3	Dnm1l
Commd7	Dnm2
Commd9	Dnmt1
Copa	Dnmt3a
Copb2	Dnph1
Cope	Dnttip1
Copg1	Dock7
Coprs	Dock9
Cops4	Dohh
Cops5	Dot1l
Cops6	Dpcd
Cops7a	Dpm2
Cops8	Dpp8
Copz1	Dpp9
Coq7	Dpy30
Coro1c	Dpysl2
Cotl1	Drap1
Cox14	Drg1
Cox17	Drosha
Cox4i1	Dscam
Cox5b	Dscc1
Cox6a1	Dst
Cox6b1	Dstn
Cox6c	Dtd1
Cox7a2	Dtd2
Cox7a2l	Dtl
Cox7b	Dtnb
Cox7c	Dtx3
Cox8a	Dtymk
Cpe	Dus1l
Cpeb1	Dusp4
Cpeb4	Dvl3
Cplx1	Dync1h1
Cpox	Dync1li1
Cpsf1	Dync1li2
Cpsf2	Dynll1
Cpsf3	Dynll2
Cpsf6	Dynlrb1
Cpsf7	Dyrk1a
Cpt1a	Dyrk2
Cramp1l	Dzip1
Crb3	E2f1
Creb3l1	E2f3
Crebbp	E2f4
Crebl2	E4f1
Creld1	Eaf1
Creld2	Eapp
Crip1	Ebag9
Crip2	Ece1
Crk	Echdc1
Crocc	Eci1
Crtc1	Eci3
Crybg3	Ecsit
Cse1l	Edem1
Csnk1a1	Edem2
Csnk1d	Edf1
Csnk1e	Eea1
Csnk1g1	Eef1a1
Csnk1g2	Eef1a2
Csnk2a1	Eef1b2
Csnk2b	Eef1d
Cspg5	Eef1g
Csrnp2	Eef2
Csrp1	Eef2k
Csrp2	Eefsec
Csrp2bp	Efemp2
Cst3	Eftud2
Cstf2t	Egln2
Ctage5	Ehbp1l1
Ctbp1	Ehmt1
Ctbp2	Ehmt2
Ctcf	Ei24
Ctdnep1	Eif1
Ctdp1	Eif1a
Ctdsp2	Eif1b
Ctdspl2	Eif2ak1
Ctnna1	Eif2b4
Ctnna2	Eif2s1
Ctnnb1	Eif2s2
Ctnnbl1	Eif3a
Ctps1	Eif3b
Ctps2	Eif3c
Ctr9	Eif3d
Ctsa	Eif3f
Ctsb	Eif3g
Ctsd	Eif3h
Cttn	Eif3j
Cttnbp2nl	Eif3k
Cuedc1	Eif3l
Cul1	Eif3m
Cul3	Eif4a1
Cul5	Eif4a2
Cul7	Eif4a3
Cul9	Eif4b
Cuta	Eif4e
Cutc	Eif4e2
Cux1	Eif4e3
Cwc25	Eif4ebp1
Cwc27	Eif4ebp2
Cxcl14	Eif4enif1
Cxcl17	Eif4g1
Cxxc1	Eif4g2
Cyb5a	Eif4g3
Cyb5b	Eif4h
Cyb5r4	Eif5
Cyc1	Eif5a
Cycs	Eif6
Cyfip2	Elavl1
Cyhr1	Elf2
Cyp51	Elmsan1
Cystm1	Elovl2
Cyth2	Elovl4
Cyth3	Elovl5
Dab2	Elp3
Dad1	Elp5
Dag1	Emb
Dap	Emc10
Dars	Emc2
Dazap2	Emc3
Dbf4	Emc6
Dbi	Emc7
Dbn1	Eme1
Dbnl	Eme2
Dbp	Emg1
Dcaf13	Emilin1
Dcaf8	Eml4
Dck	Eml5
Dclk2	Enah
Dctn1	Eno1
Dctn2	Eno3
Dctn6	Ensa
Dctpp1	Eny2
Dcun1d3	Ep300
Dda1	Ep400
Ddb1	Epb4.1
Ddi2	Epb4.1l5
Ddost	Epb41l2
Ddr1	Epb41l3
Ddrgk1	Epcam
Ddx1	Epg5
Ddx10	Epn1
Ddx11	Eprs
Ddx21	Eps15l1
Ddx23	Ept1
Ddx27	Erbb2ip
Ddx39b	Erbb3
Ddx3x	Erc1
Ddx42	Erc2
Ddx46	Ercc2
Ddx47	Ercc5
Ddx49	Ercc6
Ddx5	Ergic1
Ddx50	Ergic2
Ddx54	Ergic3
Ddx6	Erh
Deaf1	Eri1
Decr2	Eri3
Dek	Erlin1
Dennd1a	Erlin2
Dennd5a	Ermp1
Denr	Ern1
Deptor	Erp29
Derl1	Espl1
Desi1	Espn
Dgkd	Esr1
Dgkh	Esrp1
Dgkz	Esrra
Dhcr24	Esyt1
Dhdh	Etf1
Dhrs4	Etfdh
Dhrs7	Etl4
Dhx15	Etnk1
Dhx16	Etv3
Dhx30	Etv5
Dhx38	Etv6
Dhx9	Evi5
Diablo	Evi5l
Diaph1	Evl
Diaph3	Evpl
Dido1	Ewsr1
Dkc1	Exd2
Dld	Exoc3
Dlg1	Exoc3l1
Dlg5	Exoc4
Dmpk	Exoc8
Dmxl2	Exosc1
Dnah11	Exosc2
Dnaja2	Exosc9
Dnaja3	Extl3
Dnaja4	Ezh2
Dnajb11	Ezr
Dnajb12	Fabp5
Dnajb14	Fads1
Dnajb2	Fads2
Dnajb4	Faf1
Dnajc11	Fam109b
Dnajc13	Fam118a
Dnajc14	Fam120a
Dnajc2	Fam126a
Dnajc21	Fam129b
Dnajc27	Fam131a
Dnajc3	Fam134a
Dnajc5	Fam134c
Dnajc7	Fam13c
Dnajc8	Fam160a2
Dnajc9	Fam162a
Dnm1l	Fam168b
Dnm2	Fam171b
Dnmt1	Fam174a
Dnmt3a	Fam174b
Dnph1	Fam184a
Dnttip1	Fam19a5
Dock7	Fam20b
Dock9	Fam20c
Dohh	Fam216a
Dpcd	Fam219b
Dpm2	Fam21c
Dpp8	Fam32a
Dpy30	Fam3a
Dpysl2	Fam3c
Drap1	Fam46a
Drg1	Fam49a
Drosha	Fam49b
Dscam	Fam50a
Dscc1	Fam53c
Dst	Fam60a
Dstn	Fam91a1
Dtd1	Fam98a
Dtd2	Fance
Dtl	Fanci
Dtnb	Farp1
Dtx3	Farsb
Dtymk	Fasn
Dus1l	Fastk
Dusp4	Fat1
Dvl3	Fau
Dync1h1	Fbf1
Dync1li1	Fbl
Dync1li2	Fbln1
Dynll1	Fbrs
Dynll2	Fbxl19
Dynlrb1	Fbxo2
Dyrk1a	Fbxo21
Dyrk2	Fbxo31
Dzip1	Fbxo32
E2f1	Fbxo38
E2f3	Fbxo45
E2f4	Fbxo6
E4f1	Fbxo7
Eaf1	Fbxo8
Eapp	Fcho2
Ebag9	Fdft1
Ece1	Fdps
Eci1	Fem1b
Eci3	Fer
Ecsit	Filip1
Edem1	Fip1l1
Edem2	Fkbp10
Edf1	Fkbp11
Eea1	Fkbp1a
Eef1a1	Fkbp2
Eef1a2	Fkbp3
Eef1b2	Fkbp4
Eef1d	Fkbp5
Eef1g	Fkbp8
Eef2	Fkrp
Eef2k	Flii
Eefsec	Flna
Efemp2	Flnb
Eftud2	Flot1
Egln2	Flywch1
Ehbp1l1	Fmnl1
Ehmt1	Fmnl2
Ehmt2	Fmnl3
Ei24	Fmr1
Eif1	Fnbp1l
Eif1a	Fnbp4
Eif1b	Fndc3a
Eif2ak1	Fndc3b
Eif2b4	Fndc4
Eif2s1	Fosl2
Eif2s2	Foxk1
Eif3a	Foxk2
Eif3b	Foxm1
Eif3c	Foxo1
Eif3d	Foxo4
Eif3f	Foxp1
Eif3g	Foxp4
Eif3h	Foxred2
Eif3j	Fra10ac1
Eif3k	Fras1
Eif3l	Frg1l1
Eif3m	Fth1
Eif4a1	Ftl1
Eif4a2	Ftl1l1
Eif4a3	Ftsj3
Eif4e	Fubp1
Eif4e2	Fubp3
Eif4e3	Fuca1
Eif4ebp1	Furin
Eif4ebp2	Fus
Eif4enif1	Fut1
Eif4g1	Fut10
Eif4g2	Fv1
Eif4g3	Fxr2
Eif4h	Fyco1
Eif5	Fyttd1
Eif5a	Fzr1
Eif6	G3bp1
Elavl1	G3bp2
Elf2	G4
Elmsan1	G6pdx
Elovl2	Gab1
Elovl4	Gabarap
Elovl5	Gabarapl1
Elp5	Gabbr1
Emb	Gabrb3
Emc10	Gadd45a
Emc2	Gak
Emc3	Galnt1
Emc6	Galnt2
Emc7	Galnt7
Eme1	Ganab
Emg1	Gapdh
Emilin1	Gapdh-ps2
Eml4	Gar1
Eml5	Gars
Enah	Gart
Eno1	Gas2l3
Eno3	Gatad1
Ensa	Gatad2a
Eny2	Gatad2b
Ep300	Gbf1
Ep400	Gcat
Epb4.1	Gcc1
Epb4.1l5	Gclc
Epb41l2	Gcn1l1
Epb41l3	Gcsh
Epcam	Gde1
Epg5	Gdf11
Epn1	Gdi1
Eprs	Get4
Eps15l1	Gfod2
Ept1	Gfpt1
Erbb2ip	Gfra3
Erbb3	Gga1
Erc1	Ggact
Erc2	Ggnbp2
Ercc2	Gh1
Ercc5	Ghitm
Ercc6	Gid8
Ergic1	Gigyf1
Ergic2	Gigyf2
Ergic3	Gins2
Erh	Gipc1
Eri1	Gipc2
Eri3	Gipc3
Erlin1	Git1
Erlin2	Git2
Ermp1	Gkap1
Espl1	Glcci1
Espn	Glis2
Esrp1	Glo1
Esyt1	Glod4
Etf1	Glrx2
Etfdh	Glrx3
Etl4	Gls
Etnk1	Gltp
Etv3	Gltscr1l
Etv5	Gltscr2
Etv6	Glud1
Evi5l	Glul
Evl	Glyr1
Evpl	Gm2a
Ewsr1	Gm5611
Exd2	Gm884
Exoc3	Gmcl1
Exoc3l1	Gmds
Exoc4	Gmps
Exoc8	Gna11
Exosc1	Gnai2
Exosc2	Gnai3
Exosc9	Gnaq
Ezh2	Gnas
Ezr	Gnaz
Fabp5	Gnb1
Fads1	Gnb2
Fads2	Gnb2l1
Faf1	Gnl1
Fam109b	Gnl3
Fam118a	Gnl3l
Fam120a	Gnptab
Fam126a	Gnptg
Fam129b	Gns
Fam131a	Golga4
Fam134a	Golga7
Fam134c	Golgb1
Fam13c	Golim4
Fam160a2	Golt1b
Fam162a	Gon4l
Fam168b	Gorasp1
Fam171b	Gorasp2
Fam174a	Gosr2
Fam174b	Got2
Fam184a	Gpaa1
Fam19a5	Gpam
Fam20b	Gpatch1
Fam20c	Gpatch2
Fam216a	Gpatch4
Fam219b	Gpc4
Fam21c	Gpi
Fam32a	Gpkow
Fam3a	Gpr108
Fam3c	Gpr162
Fam46a	Gpr182
Fam49a	Gpr19
Fam49b	Gprasp1
Fam50a	Gps2
Fam53c	Gpsm2
Fam60a	Gpt
Fam91a1	Gpt2
Fam98a	Gpx1
Fance	Gpx4
Fanci	Gramd4
Farsb	Grb10
Fasn	Grcc10
Fastk	Greb1
Fat1	Grhl2
Fau	Grina
Fbf1	Grip1
Fbl	Gripap1
Fbln1	Grk6
Fbrs	Grn
Fbxl19	Grsf1
Fbxo2	Gse1
Fbxo31	Gsk3a
Fbxo32	Gsk3b
Fbxo38	Gspt1
Fbxo45	Gsr
Fbxo6	Gsta4
Fbxo7	Gsto1
Fbxo8	Gstp1
Fcho2	Gtf2e1
Fdft1	Gtf2e2
Fdps	Gtf2f1
Fem1b	Gtf2h2
Fer	Gtf2i
Filip1	Gtf3a
Fip1l1	Gtf3c1
Fkbp10	Gtf3c2
Fkbp11	Gtf3c5
Fkbp1a	Gtf3c6
Fkbp2	Gtpbp1
Fkbp3	Gtpbp2
Fkbp8	Gtpbp3
Fkrp	Gtse1
Flii	Gxylt1
Flna	Gyg1
Flot1	H1fx
Flywch1	H2afx
Fmnl1	H2afy
Fmnl2	H3f3b
Fmnl3	Hacd3
Fmr1	Hadha
Fnbp1l	Hadhb
Fnbp4	Hagh
Fndc3a	Hap1
Fndc3b	Hars
Fndc4	Hars2
Fosl2	Hat1
Foxk1	Haus4
Foxk2	Haus7
Foxm1	Haus8
Foxo1	Hax1
Foxo4	Hba2
Foxp1	Hbs1l
Foxp4	Hcfc1
Foxred2	Hcfc1r1
Fra10ac1	Hcn2
Fras1	Hcn4
Frg1l1	Hdac11
Fth1	Hdac2
Ftl1l1	Hdac3
Ftsj3	Hdac5
Fubp1	Hdac7
Fubp3	Hddc3
Fuca1	Hdgf
Furin	Hdgfrp2
Fut1	Hdlbp
Fut10	Hectd1
Fv1	Hectd4
Fxr2	Helb
Fyco1	Hepacam2
Fyttd1	Herc1
Fzr1	Herc2
G3bp1	Herc3
G3bp2	Herc4
G4	Herpud1
G6pdx	Hes6
Gab1	Hexa
Gabarap	Hexim1
Gabbr1	Hgs
Gabrb3	Hif1a
Gadd45a	Hint1-ps1
Gak	Hip1r
Galnt1	Hipk1
Galnt2	Hipk2
Galnt7	Hipk3
Ganab	Hira
Gapdh	Hirip3
Gapdh-ps2	Hist1h1c
Gar1	Hist1h1d
Gars	Hist1h2ac
Gart	Hist1h2ah
Gas2l3	Hist1h2ak
Gatad1	Hist1h2bb
Gatad2a	Hist1h2bd
Gatad2b	Hist1h2bg
Gbf1	Hist1h2bh
Gcat	Hist1h2bl
Gcc1	Hist1h2bo
Gclc	Hist1h3a
Gcn1l1	Hist1h3c
Gcsh	Hist1h3f
Gde1	Hist1h4b
Gdf11	Hist1h4m
Gdi1	Hist2h2aa2
Get4	Hist2h2ab
Gfod2	Hist2h2ac
Gfpt1	Hist3h2ba
Gfra3	Hist3h2bb
Gga1	Hist3h3
Ggact	Hjurp
Ggnbp2	Hk1
Gh1	Hk2
Ghitm	Hlcs
Gid8	Hltf
Gigyf1	Hm13
Gigyf2	Hmg1l1
Gins2	Hmga1
Gipc1	Hmgb2
Gipc2	Hmgb2l1
Gipc3	Hmgcr
Git1	Hmgcs1
Git2	Hmgn1
Gkap1	Hmgn2
Glcci1	Hmgn3
Glis2	Hmgn5
Glo1	Hmgn5b
Glod4	Hmmr
Glrx2	Hmox2
Glrx3	Hn1l
Gls	Hnrnpa0
Gltp	Hnrnpa1
Gltscr1l	Hnrnpa2b1
Gltscr2	Hnrnpa3
Glud1	Hnrnpab
Glul	Hnrnpc
Glyr1	Hnrnpdl
Gm2a	Hnrnpf
Gm5611	Hnrnph1
Gm884	Hnrnph2
Gmcl1	Hnrnph3
Gmds	Hnrnpl
Gmps	Hnrnpll
Gna11	Hnrnpm
Gnai2	Hnrnpu
Gnai3	Hnrnpul1
Gnaq	Hnrnpul2
Gnas	Hnrpd
Gnaz	Homer3
Gnb1	Hook2
Gnb2	Hoxb13
Gnb2l1	Hp1bp3
Gnl1	Hpcal1
Gnl3	Hr
Gnl3l	Hras
Gnptab	Hs3st3a1
Gnptg	Hs3st3b1
Gns	Hsbp1
Golga4	Hsd17b4
Golga7	Hsd17b8
Golgb1	Hsdl1
Golt1b	Hsp90aa1
Gon4l	Hsp90ab1
Gorasp1	Hsp90b1
Gorasp2	Hspa4
Gosr2	Hspa4l
Got2	Hspa5
Gpaa1	Hspa8
Gpam	Hspa9
Gpatch1	Hspb6
Gpatch2	Hspbap1
Gpatch4	Hspd1
Gpc4	Hsph1
Gpi	Htatip2
Gpkow	Htatsf1
Gpr108	Htra2
Gpr162	Htra4
Gpr182	Huwe1
Gpr19	Hyou1
Gprasp1	Hypk
Gpsm2	Iars
Gpt	Ica1
Gpt2	Ice1
Gpx1	Id1
Gpx4	Id2
Gramd4	Id3
Grb10	Ide
Grcc10	Idh2
Greb1	Idh3a
Grhl2	Ids
Grina	Iffo1
Grip1	Ifi27
Gripap1	Ifi27l2b
Grk6	Ifi30
Grn	Ifitm2
Grsf1	Ifrd2
Gse1	Ift172
Gsk3a	Ift20
Gsk3b	Ift27
Gspt1	Ift52
Gsr	Ift57
Gsta4	Igfbp3
Gsto1	Igfbp4
Gstp1	Igsf3
Gtf2e1	Igsf9b
Gtf2e2	Ikbkap
Gtf2f1	Ikbkg
Gtf2h2	Il23a
Gtf2i	Il6st
Gtf3a	Ilf2
Gtf3c2	Ilf3
Gtf3c5	Ilkap
Gtf3c6	Immt
Gtpbp1	Imp4
Gtpbp2	Impact
Gtpbp3	Impad1
Gtse1	Impdh1
Gxylt1	Impdh2
Gyg1	Ina
H1fx	Incenp
H2afx	Ing1
H2afy	Ing2
H3f3b	Inha
Hacd3	Inhbe
Hadha	Ino80d
Hadhb	Inppl1
Hagh	Insr
Hap1	Ints10
Hars	Ints3
Hars2	Ints4
Hat1	Ip6k1
Haus4	Ip6k2
Haus7	Ipo4
Haus8	Ipo5
Hax1	Ipo7
Hba2	Ipo8
Hbs1l	Ipo9
Hcfc1	Ipp
Hcfc1r1	Iqca1
Hcn2	Iqcb1
Hcn4	Iqgap1
Hdac11	Irak1
Hdac2	Irak2
Hdac3	Irf2bp2
Hdac7	Irf3
Hddc3	Irf6
Hdgf	Irs1
Hdgfrp2	Irs2
Hdlbp	Ist1
Hectd1	Isy1
Hectd4	Isyna1
Helb	Itch
Hepacam2	Itga3
Herc1	Itga6
Herc2	Itgb1
Herc3	Itgb5
Herc4	Itm2b
Hes6	Itm2c
Hexa	Itpr1
Hgs	Itsn1
Hif1a	Itsn2
Hint1-ps1	Ivns1abp
Hip1r	Jade1
Hipk1	Jade2
Hipk2	Jag2
Hipk3	Jagn1
Hira	Jak1
Hirip3	Jakmip1
Hist1h1d	Jarid2
Hist1h2ac	Jazf1
Hist1h2ah	Jdp2
Hist1h2ak	Jmjd6
Hist1h2bb	Josd1
Hist1h2bd	Josd2
Hist1h2bg	Jph1
Hist1h2bh	Jph3
Hist1h2bl	Jph4
Hist1h2bo	Jrk
Hist1h3a	Jund
Hist1h3c	Jup
Hist1h3f	Kalrn
Hist1h4b	Kansl1
Hist1h4m	Kansl3
Hist2h2aa2	Kars
Hist2h2ab	Kat2a
Hist2h2ac	Kat6a
Hist3h2ba	Kat6b
Hist3h2bb	Kat7
Hist3h3	Kcmf1
Hjurp	Kcna4
Hk1	Kcnc3
Hk2	Kcnh2
Hlcs	Kcnh3
Hltf	Kcnh8
Hm13	Kcnj4
Hmg1l1	Kcnk1
Hmga1	Kctd14
Hmgb2	Kctd3
Hmgb2l1	Kctd9
Hmgcr	Kdelr1
Hmgcs1	Kdelr2
Hmgn1	Kdm2a
Hmgn2	Kdm2b
Hmgn3	Kdm3a
Hmgn5	Kdm3b
Hmgn5b	Kdm4a
Hmmr	Kdm4b
Hmox2	Kdm5a
Hn1l	Kdm5b
Hnrnpa0	Kdm5c
Hnrnpa1	Kdm7a
Hnrnpa2b1	Kdm8
Hnrnpa3	Kdsr
Hnrnpab	Khdrbs1
Hnrnpc	Khdrbs2
Hnrnpdl	Khdrbs3
Hnrnpf	Khnyn
Hnrnph1	Khsrp
Hnrnph2	Kidins220
Hnrnph3	Kif11
Hnrnpll	Kif13a
Hnrnpm	Kif13b
Hnrnpu	Kif14
Hnrnpul1	Kif18b
Hnrnpul2	Kif1a
Hnrpd	Kif1b
Homer3	Kif1c
Hook2	Kif20a
Hoxb13	Kif20b
Hp1bp3	Kif21a
Hpcal1	Kif21b
Hr	Kif22
Hras	Kif23
Hs3st3a1	Kif2c
Hs3st3b1	Kif3a
Hsbp1	Kif3b
Hsd17b4	Kif3c
Hsd17b8	Kif4a
Hsdl1	Kif5a
Hsp90aa1	Kif5b
Hsp90b1	Kif5c
Hspa4	Kifc1
Hspa4l	Kifc3
Hspa5	Kit
Hspa9	Klc1
Hspb6	Klc2
Hspbap1	Klf7
Hspd1	Klf9
Hsph1	Klhdc10
Htatip2	Klhdc3
Htatsf1	Klhl11
Htra2	Klhl12
Htra4	Klhl22
Huwe1	Klhl24
Hyou1	Klhl29
Hypk	Klhl3
Iars	Klhl42
Ica1	Klhl8
Ice1	Kmt2a
Id1	Kmt2b
Id2	Kmt2e
Id3	Knop1
Ide	Kntc1
Idh3a	Kpnb1
Ids	Kras
Iffo1	Krcc1
Ifi27	Kri1
Ifi27l2b	Krr1
Ifi30	Krt18
Ifitm2	Krt20
Ifrd2	Krt79
Ift172	Krt8
Ift20	Krt85
Ift27	Krtcap2
Ift52	Ksr2
Ift57	Ktn1
Igfbp3	Kxd1
Igsf3	L3mbtl2
Igsf9b	l7Rn6
Ikbkap	Lace1
Ikbkg	Lad1
Il23a	Lage3
Il6st	Lama4
Ilf2	Lamp1
Ilf3	Lamtor1
Ilkap	Lamtor2
Immt	Lap3
Imp4	Laptm4a
Impact	Laptm4b
Impad1	Larp1
Impdh1	Larp1b
Impdh2	Larp4b
Ina	Larp7
Incenp	Lars
Ing1	Las1l
Ing2	Lbh
Inha	Lbr
Inhbe	Lcat
Ino80d	Ldb1
Inppl1	Ldha
Insr	Ldlr
Ints10	Ldoc1l
Ints3	Lemd3
Ints4	Leng8
Ip6k1	Leo1
Ip6k2	Leprotl1
Ipo4	Letmd1
Ipo5	Lhx3
Ipo7	Lias
Ipo8	Lig1
Ipo9	Lima1
Ipp	Limch1
Iqca1	Lims1
Iqcb1	Lin7c
Iqgap1	Litaf
Irak1	Llgl1
Irf2bp2	Lman2
Irf3	Lman2l
Irs2	Lmf2
Ist1	Lmna
Isy1	Lmnb1
Isyna1	Lmnb2
Itch	Lmo4
Itga3	Lmo7
Itga6	Lonp1
Itgb1	Lonrf1
Itgb5	Lpgat1
Itm2b	Lpin1
Itm2c	Lpp
Itsn1	Lppr3
Itsn2	Lrba
Ivns1abp	Lrig1
Jade1	Lrp11
Jade2	Lrp5
Jag2	Lrp6
Jagn1	Lrrc23
Jak1	Lrrc45
Jakmip1	Lrrc47
Jarid2	Lrrc58
Jazf1	Lrrc59
Jdp2	Lrrc75a
Jmjd6	Lrrc75b
Josd1	Lrrc8d
Josd2	Lrrfip1
Jph1	Lrrfip2
Jph3	Lsm12
Jph4	Lsm14a
Jrk	Lsm14b
Jund	Lsm2
Jup	Lsm3
Kalrn	Lsm4
Kansl1	Lsm7
Kansl3	Lsr
Kars	Lta4h
Kat2a	Ltbp3
Kat6a	Ltbp4
Kat6b	Ltbr
Kat7	Luc7l
Kcmf1	Luc7l2
Kcna4	Luc7l3
Kcnc3	Ly6e
Kcnh2	Lyar
Kcnh3	Lypla1
Kcnh8	Lysmd2
Kcnj4	Lztr1
Kcnk1	Lzts2
Kctd14	M6pr
Kctd3	Macf1
Kctd9	Macrod1
Kdelr1	Mad1l1
Kdelr2	Mad2l1
Kdm2a	Madd
Kdm2b	Maf1
Kdm3a	Mafg
Kdm3b	Mafk
Kdm4a	Maged1
Kdm4b	Mageh1
Kdm5a	Magi1
Kdm5b	Mal2
Kdm5c	Man1b1
Kdm7a	Man2a1
Kdm8	Man2a2
Kdsr	Man2c1
Khdrbs1	Manf
Khdrbs2	Map1a
Khdrbs3	Map1b
Khnyn	Map1lc3b
Khsrp	Map2
Kidins220	Map2k2
Kif11	Map3k10
Kif13a	Map3k11
Kif14	Map3k12
Kif18b	Map3k7
Kif1a	Map4
Kif1b	Map4k4
Kif1c	Map7
Kif20a	Map7d1
Kif20b	Mapk1
Kif21a	Mapk6
Kif21b	Mapk8ip1
Kif22	Mapk8ip2
Kif23	Mapk8ip3
Kif2c	Mapkapk2
Kif3a	Mapre2
Kif3b	Marcks
Kif3c	Mark2
Kif4a	Mars
Kif5a	Mars4
Kif5b	Mars5
Kif5c	Mars6
Kifc1	Mars9
Kifc3	Marveld2
Kit	Mast2
Klc1	Mast3
Klc2	Mat2a
Klf7	Matr3
Klf9	Mau2
Klhdc10	Max
Klhdc3	Maz
Klhl11	Mb21d2
Klhl12	Mbd1
Klhl22	Mbd2
Klhl24	Mbd3
Klhl29	Mbd6
Klhl3	Mblac1
Klhl42	Mbnl1
Klhl8	Mbnl2
Kmt2a	Mboat1
Kmt2b	Mbtps1
Kmt2e	Mccc1
Knop1	Mcf2l
Kntc1	Mcm2
Kpnb1	Mcm3
Kras	Mcm3ap
Krcc1	Mcm4
Kri1	Mcm5
Krr1	Mcm6
Krt20	Mcm7
Krt79	Mcoln1
Krt8	Mcu
Krt85	Mdc1
Krtcap2	Mdh1
Ksr2	Mdh2
Ktn1	Mdm1
Kxd1	Mdm2
L3mbtl2	Mdm4
l7Rn6	Mdn1
Lace1	Me1
Lad1	Me2
Lage3	Mea1
Lama4	Med1
Lamp1	Med13
Lamtor1	Med13l
Lamtor2	Med25
Lap3	Mef2b
Laptm4a	Mef2bnb
Laptm4b	Megf8
Larp1	Memo1
Larp1b	Men1
Larp4b	Mest
Larp7	Metap1
Lars	Metazoa_SRP
Las1l	Mettl13
Lbh	Mettl14
Lbr	Mettl16
Lcat	Mettl9
Ldb1	Mfap3l
Ldha	Mfn1
Ldlr	Mfng
Ldoc1l	Mfsd1
Lemd3	Mfsd5
Leng8	Mfsd6
Leo1	Mga
Leprotl1	MGC94207
Letmd1	Mgea5
Lhx3	Mgrn1
Lias	Mgst1
Lig1	Mia3
Lima1	Mib1
Limch1	Mib2
Lims1	Mical2
Lin7c	Micalcl
Litaf	Micu1
Llgl1	Mid1ip1
Lman2	Midn
Lman2l	Mief1
Lmf2	Mier1
Lmna	Mier2
Lmnb1	Mif
Lmnb2	Mink1
Lmo4	Minos1
LOC100294508	Mk1
LOC100359539	Mki67
LOC100359574	Mknk2
LOC100359600	Mkrn1
LOC100359668	Mlec
LOC100359825	Mlf2
LOC100359912	Mllt1
LOC100359916	Mllt10
LOC100360002	Mllt6
LOC100360056	Mmp24
LOC100360087	Mnat1
LOC100360117	Mnd1
LOC100360150	Mon2
LOC100360154	Morf4l2
LOC100360260	Mpdz
LOC100360274	Mphosph10
LOC100360449	Mphosph8
LOC100360491	Mpp3
LOC100360573	Mpp6
LOC100360604	Mprip
LOC100360638	Mrfap1
LOC100360645	Mrp63
LOC100360647	Mrpl13
LOC100360679	Mrpl15
LOC100360726	Mrpl17
LOC100360750	Mrpl18
LOC100360791	Mrpl19
LOC100360856	Mrpl27
LOC100360977	Mrpl28
LOC100361060	Mrpl34
LOC100361061	Mrpl41
LOC100361067	Mrpl51
LOC100361103	Mrpl54
LOC100361180	mrpl9
LOC100361240	Mrps11
LOC100361644	Mrps12
LOC100361811	Mrps18a
LOC100361854	Mrps18b
LOC100361934	Mrps18c
LOC100362027	Mrps2
LOC100362142	Mrps21
LOC100362149	Mrps22
LOC100362298	Mrps23
LOC100362333	Mrps24
LOC100362338	Mrps25
LOC100362339	Mrps26
LOC100362344	Mrps27
LOC100362366	Mrps28
LOC100362384	Mrps33
LOC100362432	Mrps5
LOC100362583	Mrps7
LOC100362620	Mrps9
LOC100362640	Msh6
LOC100362684	Msi1
LOC100362751	Msi2
LOC100362830	Msl1
LOC100362927	Msl2
LOC100362999	Msmo1
LOC100363012	Msrb3
LOC100363048	Mta1
LOC100363268	Mta2
LOC100363408	Mta3
LOC100363452	Mtch1
LOC100363469	Mtch2
LOC100363537	Mtcl1
LOC100363642	Mtdh
LOC100363675	Mthfd1
LOC100363800	Mthfd1l
LOC100364190	Mthfd2
LOC100364500	Mtif2
LOC100364509	Mtif3
LOC100364748	Mtmr2
LOC100365810	Mtmr3
LOC100365839	Mtmr4
LOC100909464	Mtpn
LOC100909476	Mtr
LOC100909544	Mtss1
LOC100909771	Mtss1l
LOC100910017	Mtus1
LOC100910109	Mum1
LOC100910370	Mvb12a
LOC100910438	Mvp
LOC100910472	Mybbp1a
LOC100910540	Mybl1
LOC100910575	Mybl2
LOC100910636	Mybpc1
LOC100910710	Mycn
LOC100910717	Myef2
LOC100910771	Myeov2
LOC100910792	Myg1
LOC100910882	Myh10
LOC100910944	Myh14
LOC100911238	Myh9
LOC100911256	Myl12a
LOC100911286	Myl12b
LOC100911295	Myl6b
LOC100911319	Mylip
LOC100911337	Mylk
[truncated: 2,269 more rows]
