# Supplementary figures and images for: Circadian RNA expression elicited by 3’-UTR IRAlu-paraspeckle associated elements
Source: eLife journal article supplement (doi:10.7554/elife.14837), 2016-07-21

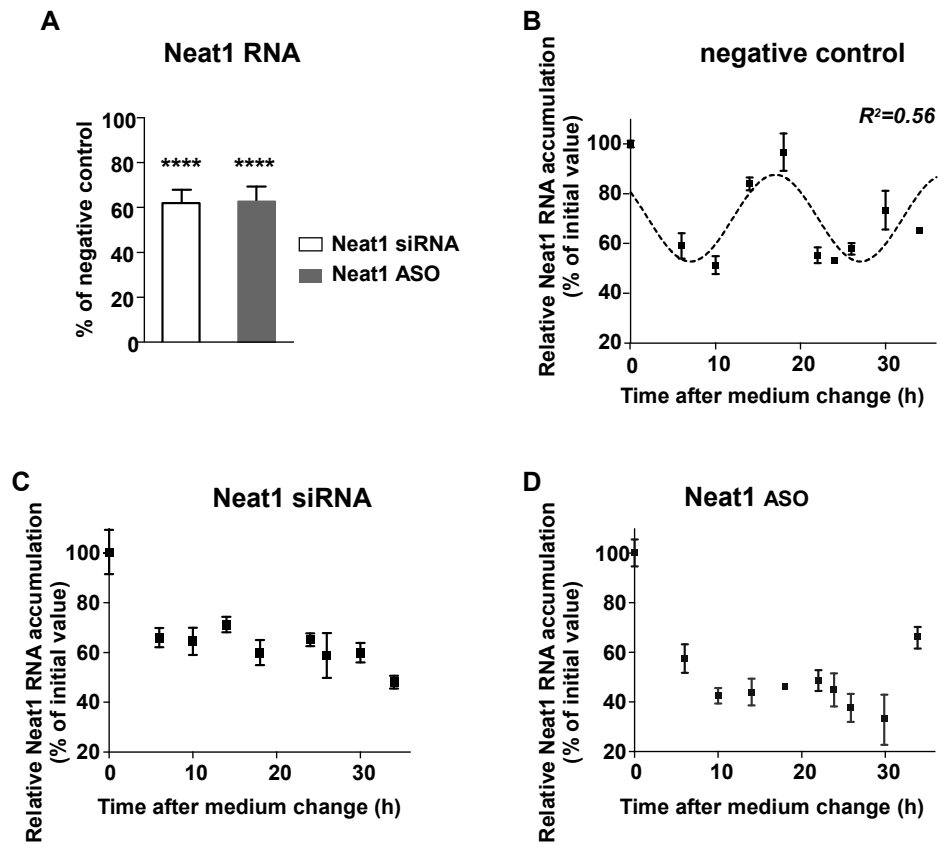

Figure 5-figure supplement 1

Supplement: supp [file elife-14837-supp-v1.zip]

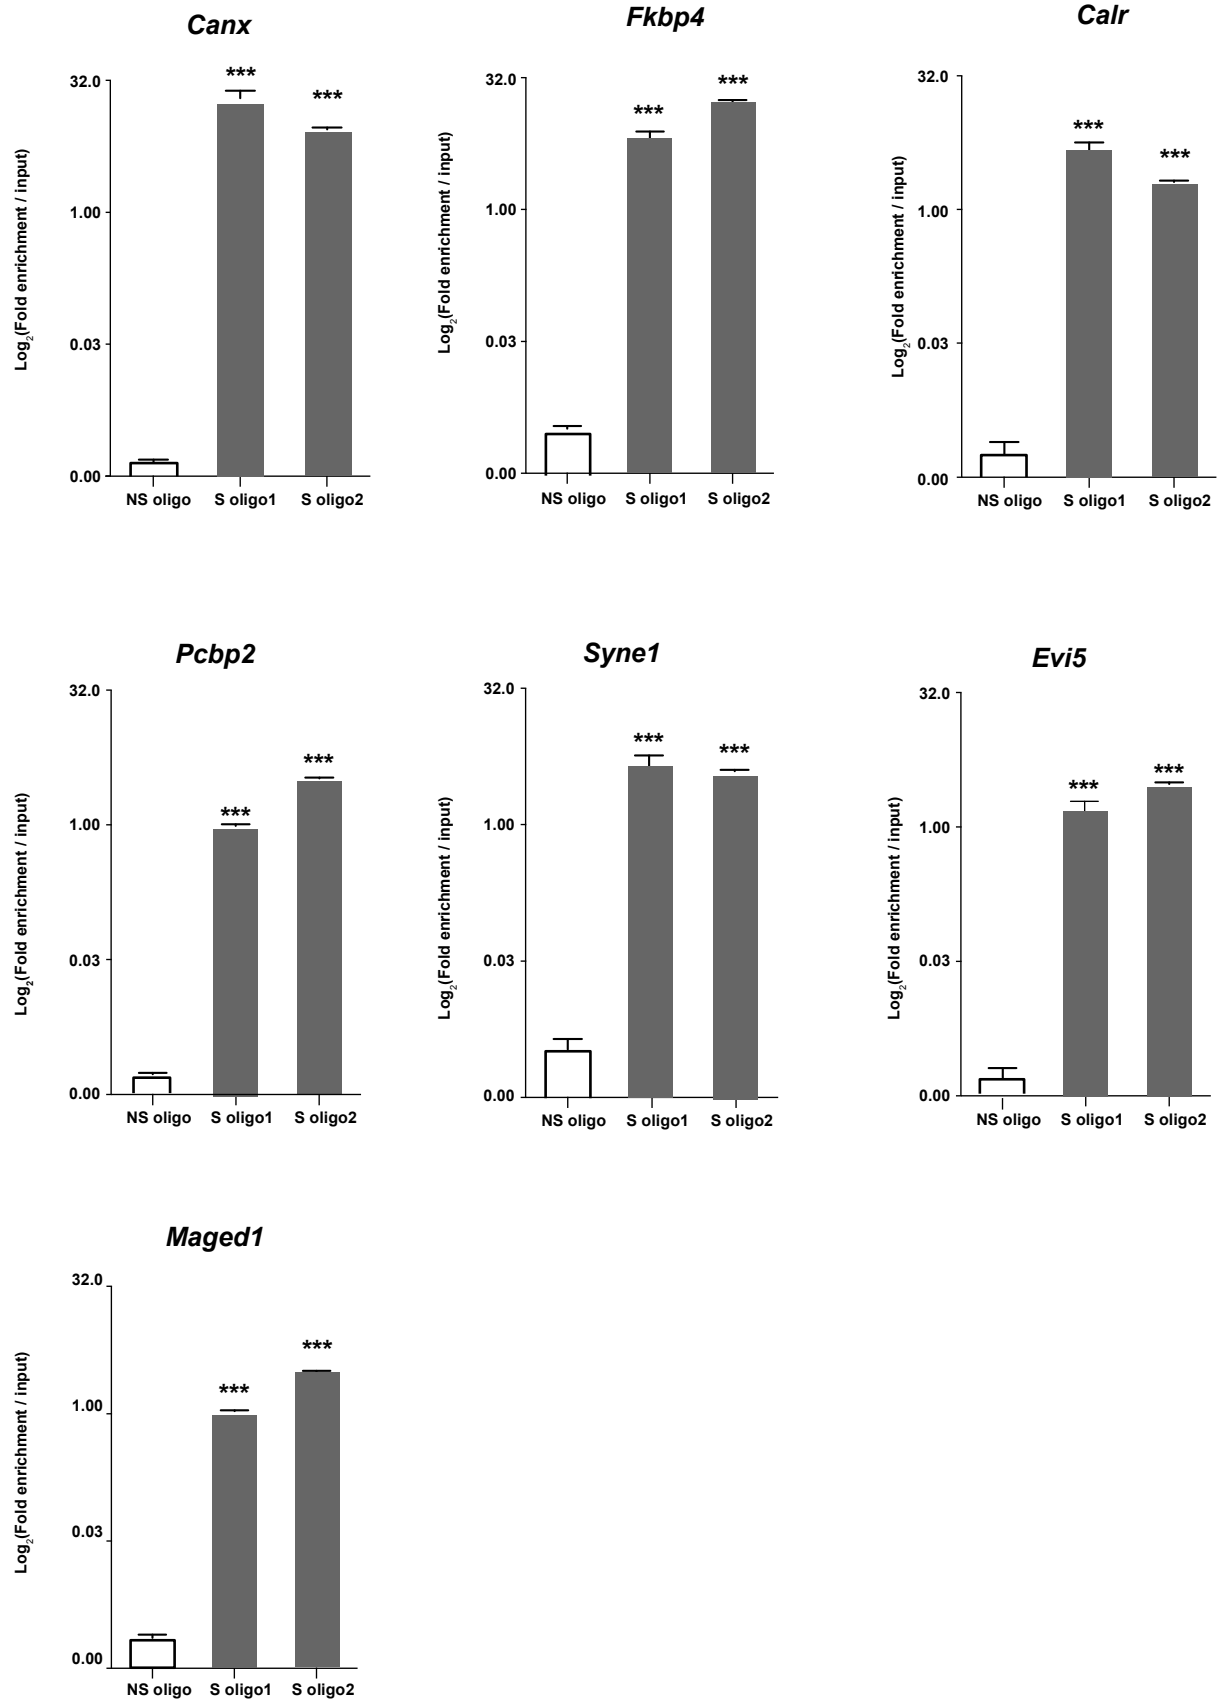

Figure 6-figure supplement 1

Supplement: supp [file elife-14837-supp-v1.zip]

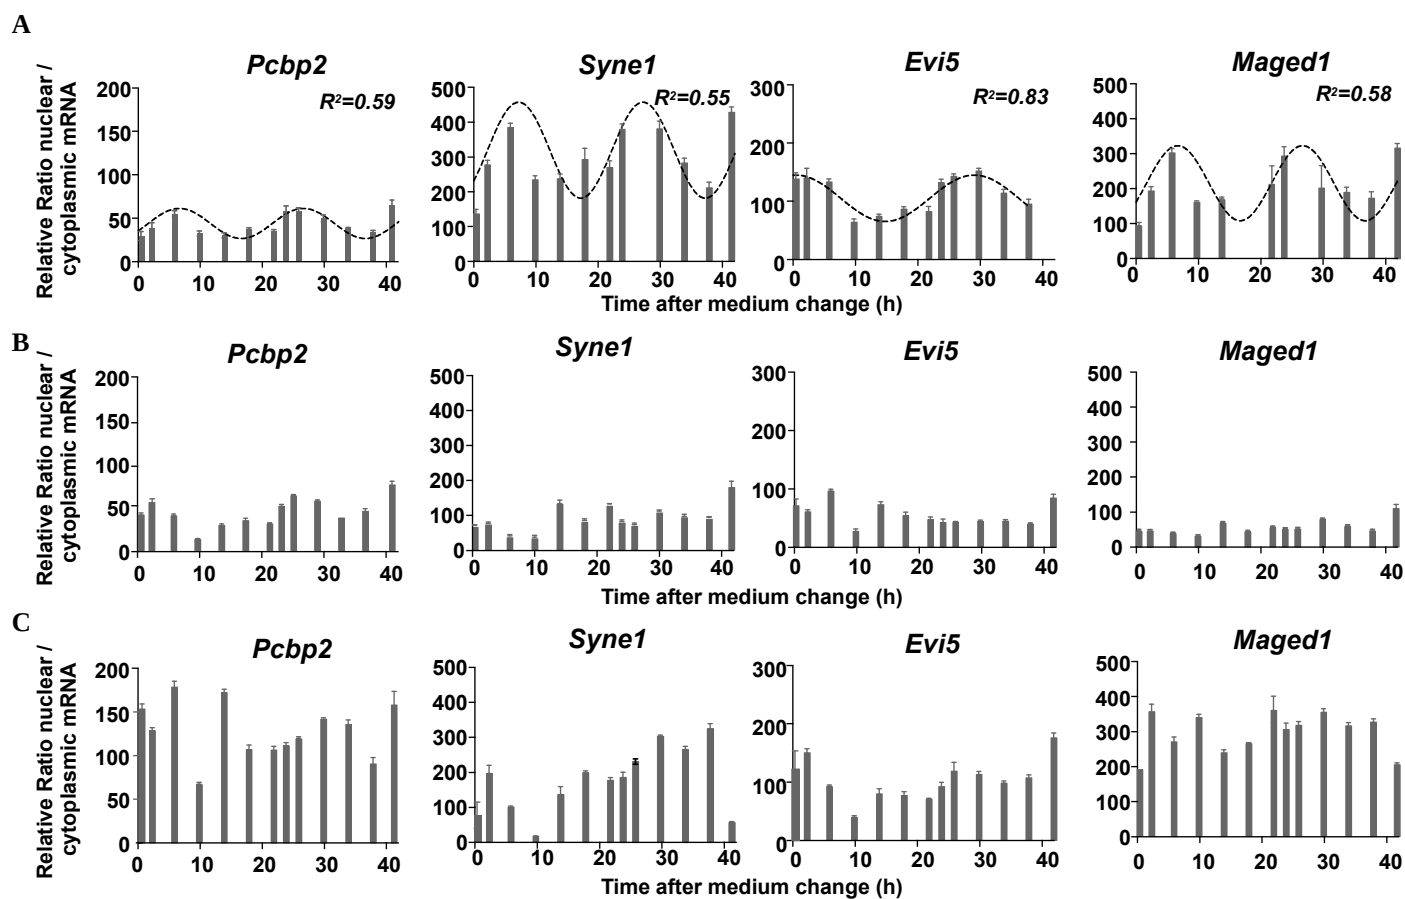

Figure 6-figure supplement 2

Supplement: supp [file elife-14837-supp-v1.zip]

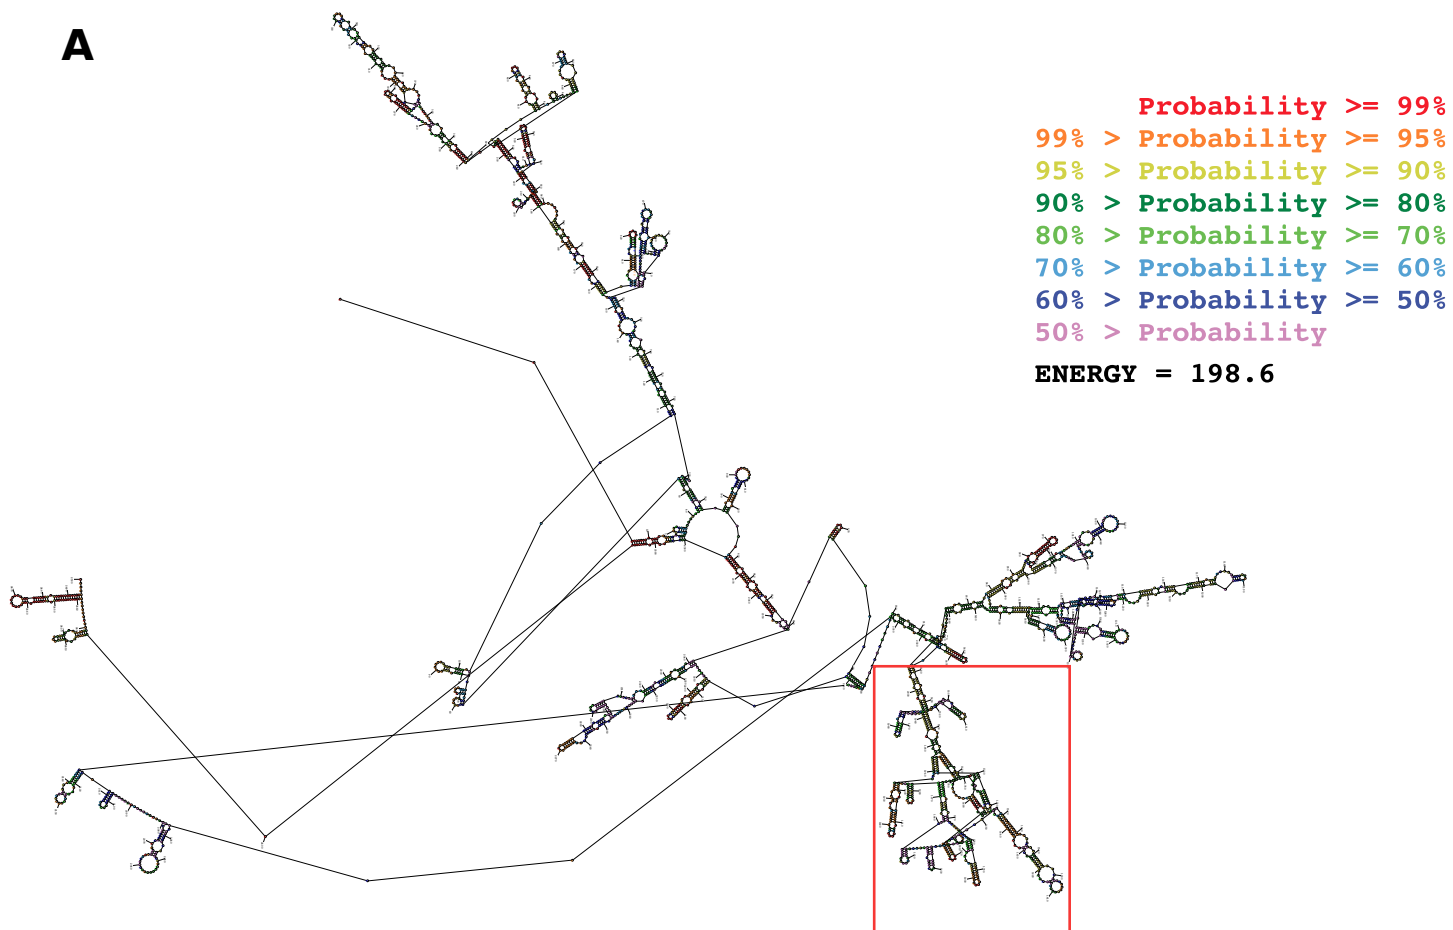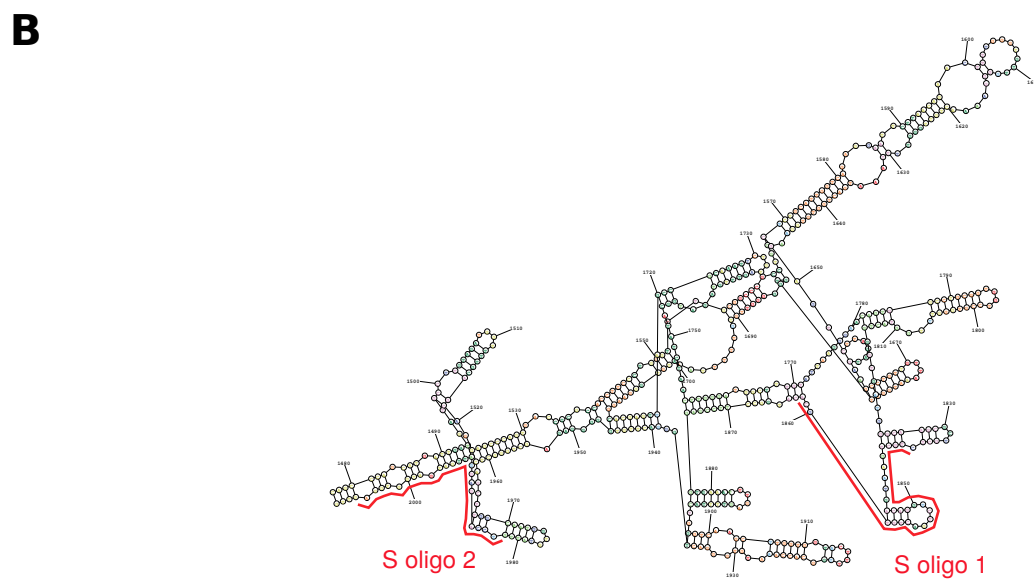

Figure 4-figure supplement 1

Supplement: supp [file elife-14837-supp-v1.zip]

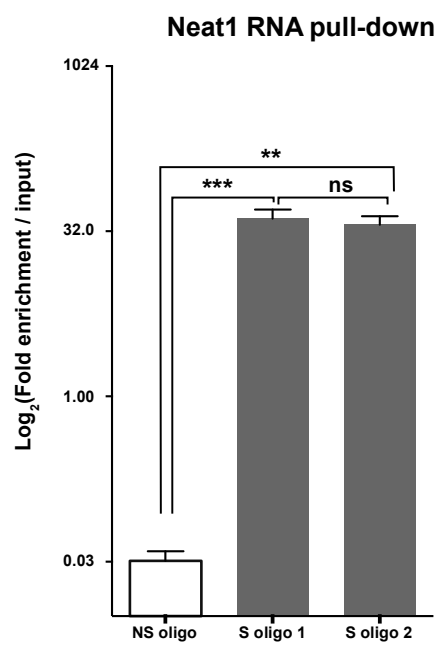

**Figure 4-figure supplement 2**

Supplement: supp [file elife-14837-supp-v1.zip]

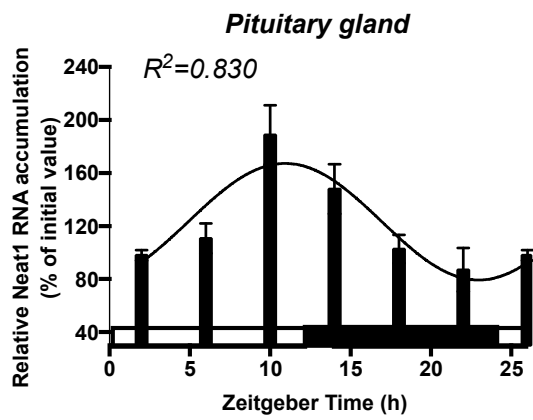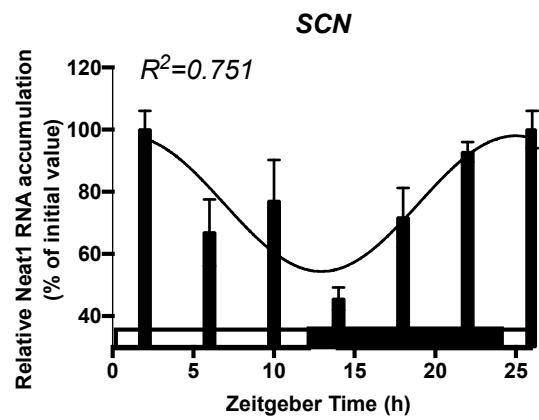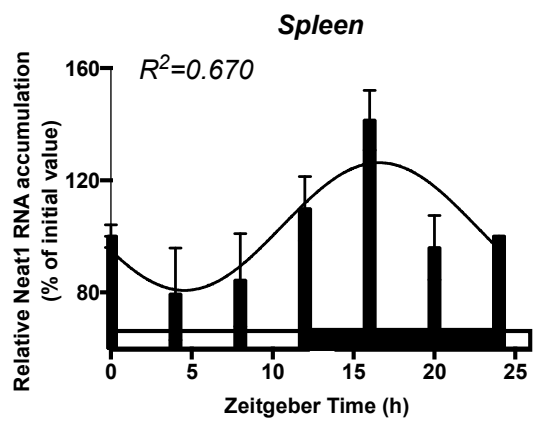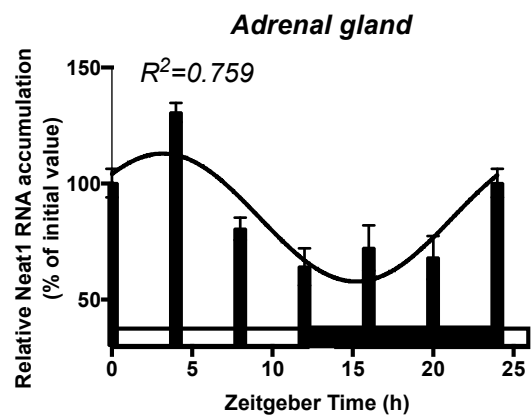

Figure 3-figure supplement 1

Supplement: supp [file elife-14837-supp-v1.zip]
